# Supplementary material for: 1,2-Migration in β-(acyloxy)ethyl radicals revisited—concerted or stepwise?
Source: Royal Society of Chemistry journal article supplement (doi:10.1039/b103324g), 2001-01-01
Supplement: b103324g.doc [file b103324g.doc]

**Supplementary data**

**Structures**

**1a**

1\1\GINC-TEA\SP\UB3LYP\CC-pVDZ\C6H11O2(2)\ZIPSE\07-Sep-2000\0\\#BECKE3

LYP/CC-PVDZ SCF=(DIRECT,TIGHT) GFINPUT GUESS=READ GEOM=CHECK INT=ULTRAFINE\\acoxch3p1sp1 b3lyp/cc-pVDZ//b3lyp/6-31G(d) sp\\0,2\C,0.713586125

3,-0.0417239947,-1.1957615578\O,0.7184279768,-0.0166892533,0.152146853

6\C,2.1331857996,-0.0340121319,-1.7258737037\O,-0.2795360149,-0.066676

1298,-1.8923864798\C,-1.4281352977,-1.1656427428,0.4874749119\C,-0.580

0504245,-0.0106724714,0.897793206\H,-1.1202161138,-2.1741936384,0.7475

115932\H,-2.2644701097,-1.0374401534,-0.1882926142\H,2.1129778146,-0.0

765840372,-2.8154728711\H,2.6526349954,0.8729010425,-1.3989915947\H,2.

6893823855,-0.8891347386,-1.328238703\C,-1.2701141968,1.3374279197,0.6

702068848\H,-0.5950103685,2.1588886482,0.9323543416\H,-2.1600411156,1.

4084722376,1.3052527768\H,-1.5750387639,1.4462272042,-0.3725267975\C,-

0.1120828563,-0.1602630826,2.3503546719\H,-0.9722095638,-0.1334291988,

3.0268062761\H,0.5715035522,0.6521913574,2.617928096\H,0.4110166941,-1

.1116566372,2.4904200273\\Version=SGI-G98RevA.6\HF=-385.6829846\S2=0.7

53817\S2-1=0.\S2A=0.750009\RMSD=4.389e-09\Dipole=0.3582699,0.04526,0.5

979693\PG=C01 [X(C6H11O2)]\\@

**2a**

1\1\GINC-TEA\SP\UB3LYP\CC-pVDZ\C6H11O2(2)\ZIPSE\07-Sep-2000\0\\#BECKE3

LYP/CC-PVDZ SCF=(DIRECT,TIGHT) GFINPUT GUESS=READ GEOM=CHECK INT=ULTRAFINE\\acoxch31sp1 b3lyp/cc-pVDZ//b3lyp/6-31G(d) sp\\0,2\C,1.3807719067

,-0.7107312086,-0.0979148033\O,1.3816483516,-0.6740457962,1.1147004621

\C,2.6199001276,-0.72707308,-0.9664072887\O,0.2657084199,-0.7502766127

,-0.8578781918\C,-1.0222512384,-0.7504895914,-0.1305762988\C,-1.475720

5956,0.6160869541,0.2465716793\H,-1.6955372987,-1.2117754869,-0.859646

6381\H,-0.9130657135,-1.400352985,0.7400585426\H,3.5075474273,-0.69032

10649,-0.333859455\H,2.6375685198,-1.6332201644,-1.5808046728\H,2.6124

581035,0.1289807535,-1.6490761852\C,-1.2468118997,1.1480498871,1.62651

4794\H,-0.3351097407,1.7673519414,1.6788842862\H,-1.1180529158,0.34583

20188,2.3589831043\H,-2.0785876061,1.7907617915,1.9473019666\C,-1.8910

39292,1.5614923968,-0.8383500155\H,-2.6429824287,2.2777959992,-0.48201

00527\H,-2.3018977615,1.0340016703,-1.7075934293\H,-1.0402888087,2.161

5126503,-1.2058440308\\Version=SGI-G98RevA.6\HF=-385.6918821\S2=0.7540

52\S2-1=0.\S2A=0.750013\RMSD=8.930e-09\Dipole=-0.235576,0.1449496,-0.5

912642\PG=C01 [X(C6H11O2)]\\@

**3a**

1\1\GINC-TEA\SP\UB3LYP\CC-pVDZ\C6H11O2(2)\ZIPSE\16-Sep-2000\0\\#BECKE3

LYP/CC-PVDZ SCF=(DIRECT,TIGHT) GFINPUT GUESS=READ GEOM=CHECK INT=ULTRAFINE\\acoxch3int1sp1 b3lyp/cc-pVDZ//b3lyp/6-31G(d) sp\\0,2\C,0.4221863

654,1.3612779591,0.0442531779\O,-0.9791512337,1.1857938297,0.244057689

9\C,-1.3037987558,0.0186950408,-0.4295044472\O,-0.1937790713,-0.812291

1359,-0.482446492\C,0.9642854686,-0.083418572,0.0059362162\C,-2.592715

1894,-0.6186299066,-0.0254239158\C,2.1122211456,-0.2778890246,-0.97863

29635\C,1.2972958947,-0.6098932464,1.4049299395\H,0.8151594343,1.95762

62062,0.8709260284\H,0.6065994366,1.8819929858,-0.9060793083\H,-3.4134

164335,0.096949498,-0.1298332336\H,-2.7982598939,-1.4818727471,-0.6648

543263\H,-2.5676377883,-0.965238612,1.021683735\H,2.3998896603,-1.3329

968378,-1.0283894305\H,1.8166769555,0.0455867814,-1.9815367513\H,2.990

5461078,0.3002715042,-0.6682704283\H,1.4713589048,-1.6899489069,1.3703

665001\H,2.1981651996,-0.1261369023,1.8015726478\H,0.4675112815,-0.415

1080223,2.0921769412\\Version=SGI-G98RevA.6\HF=-385.6693471\S2=0.75257

\S2-1=0.\S2A=0.750005\RMSD=5.252e-09\Dipole=0.6481334,0.1008245,0.2158

753\PG=C01 [X(C6H11O2)]\\@

**4a**

1\1\GINC-TEA\SP\UB3LYP\CC-pVDZ\C6H11O2(2)\ZIPSE\10-Sep-2000\0\\#BECKE3

LYP/CC-PVDZ SCF=(DIRECT,TIGHT) GFINPUT GUESS=READ GEOM=CHECK INT=ULTRAFINE\\acoxch3ts1sp1 b3lyp/cc-pVDZ//b3lyp/6-31G(d) sp\\0,2\C,0.26313332

33,1.2987545083,-1.1153623864\C,0.2790262232,1.3060959291,0.2793667282

\C,1.5974169431,1.3083886469,1.0108829821\C,-0.9109512572,1.838744695,

1.0366739357\O,-0.140450354,-0.6980337226,0.6942959194\C,-0.2865312628

,-1.3358166251,-0.3979935139\C,-0.6006914805,-2.8297659818,-0.23178697

\O,-0.2018655641,-0.8789332703,-1.5588000614\H,0.2067516297,-3.3087772

614,0.3303183673\H,-1.5216725293,-2.9433326552,0.3481051797\H,-0.71126

63086,-3.3052819341,-1.2070379681\H,-0.6317869218,1.5597237872,-1.6672

652375\H,1.1760501297,1.1774837373,-1.6858536539\H,1.5053983338,0.8147

008614,1.9818440985\H,2.3771505882,0.8026854932,0.434602983\H,1.920318

5843,2.3440647439,1.1885952684\H,-1.0075276846,1.346019654,2.007681442

7\H,-0.7834846886,2.915742429,1.2163967179\H,-1.8398187217,1.694300052

7,0.4779612836\\Version=SGI-G98RevA.6\HF=-385.6656778\S2=0.755499\S2-1

=0.\S2A=0.75002\RMSD=7.488e-09\Dipole=0.1158196,0.5293326,0.3791548\PG

=C01 [X(C6H11O2)]\\@

**5a**

1\1\GINC-TEA\SP\UB3LYP\CC-pVDZ\C6H11O2(2)\ZIPSE\18-Sep-2000\0\\#BECKE3

LYP/CC-PVDZ SCF=(DIRECT,TIGHT) GFINPUT GUESS=READ GEOM=CHECK INT=ULTRAFINE\\acoxch3ts3sp1 b3lyp/cc-pVDZ//b3lyp/6-31G(d) sp\\0,2\C,1.25340106

,-0.7796712655,-1.2194651815\C,1.4943161939,-0.1031913008,-0.046455157

\C,2.2039674486,1.2230061516,-0.051893978\C,1.3639471198,-0.7937854168

,1.285113287\O,-0.5035386146,0.7861577586,-0.1734044805\C,-1.514251908

5,-0.043444978,-0.0809912118\O,-1.4934364954,-1.264093782,-0.167240597

7\C,-2.8155002707,0.7264268616,0.1999330436\H,1.4367166147,-0.30719024

47,-2.1801050179\H,0.7961428124,-1.7615373778,-1.2168144395\H,-3.66100

72544,0.0681939637,-0.0095701214\H,-2.8786469767,1.6349106061,-0.40450

73335\H,-2.8398170948,1.0203947519,1.2549945037\H,1.0317930022,-0.0904

744124,2.0551861011\H,0.6562307374,-1.6230172066,1.2331270351\H,2.3455

302896,-1.1785335704,1.5956561653\H,1.7049420911,1.9219738671,0.626200

7488\H,3.2355514164,1.0954614854,0.3038268306\H,2.233087383,1.66726601

27,-1.0502786604\\Version=SGI-G98RevA.6\HF=-385.6624872\S2=0.765044\S2

-1=0.\S2A=0.750065\RMSD=8.194e-09\Dipole=0.8420418,0.5134303,0.1584986

\PG=C01 [X(C6H11O2)]\\@

**7a**

1\1\GINC-TEA\SP\UB3LYP\CC-pVDZ\C6H11O2(2)\ZIPSE\14-Sep-2000\0\\#BECKE3

LYP/CC-PVDZ SCF=(DIRECT,TIGHT) GFINPUT GUESS=READ GEOM=CHECK INT=ULTRAFINE\\acoxch3ts5sp1 b3lyp/cc-pVDZ//b3lyp/6-31G(d) sp\\0,2\C,-0.7067344

518,-0.6822987027,-2.4968079472\C,-0.6813078419,-0.6251876738,-0.99571

89232\O,0.545915755,-0.6081408258,-0.4247827617\C,0.5372980719,0.28230

34218,0.7815079857\C,0.4788861904,-0.6290238498,2.0079979566\O,-1.6153

049313,-0.1068963791,-0.2864450116\C,-0.6905976606,1.1389466688,0.6475

290424\C,1.8466163815,1.0656810103,0.6976871031\H,-1.3239149534,1.2759

413984,1.5168105132\H,-0.6247327621,2.0042662395,-0.0088213508\H,-1.71

69738149,-0.9081597092,-2.8460729504\H,-0.3968783804,0.2824823144,-2.9

329977111\H,-0.0172615325,-1.4480421375,-2.8637270566\H,2.697367412,0.

3776423071,0.6446743964\H,1.8630014055,1.701001177,-0.1937095262\H,1.9

745933004,1.7007772609,1.5808230847\H,1.3104251142,-1.3403612066,1.991

5492179\H,0.5449554139,-0.0381873977,2.9289347137\H,-0.4604319297,-1.1

895878555,2.0191875503\\Version=SGI-G98RevA.6\HF=-385.643123\S2=0.7617

16\S2-1=0.\S2A=0.750047\RMSD=4.223e-09\Dipole=0.4333236,0.4134107,0.14

16615\PG=C01 [X(C6H11O2)]\\@

**8a**

1\1\GINC-TEA\SP\UB3LYP\CC-pVDZ\C6H11O2(2)\ZIPSE\13-Sep-2000\0\\#BECKE3

LYP/CC-PVDZ SCF=(DIRECT,TIGHT) GFINPUT GUESS=READ GEOM=CHECK INT=ULTRAFINE\\acoxch3ts2sp1 b3lyp/cc-pVDZ//b3lyp/6-31G(d) sp\\0,2\C,-0.3801778

85,1.014459906,-2.3859502037\C,-0.3905628102,0.9724616669,-0.883948304

6\O,0.6610203878,0.9437926431,-0.1488816972\O,-1.4875437521,0.37744987

19,-0.3234412918\C,-1.079609188,-0.3092836399,0.8975680691\C,0.4015558

587,-0.5854879225,0.8353594898\C,0.8367784514,-1.7359336984,-0.0344840

854\C,1.2152053378,-0.3283437696,2.0713880305\H,-1.6876973542,-1.21834

58911,0.9317848896\H,-1.329760579,0.3271394389,1.7538249046\H,-1.32220

0997,1.4246787913,-2.7628610193\H,0.4451749184,1.6417028321,-2.7311535

492\H,-0.2592861148,0.0097789049,-2.8248262423\H,2.286295367,-0.338550

2101,1.8413587938\H,0.9687479558,0.6461361611,2.5044307995\H,1.0367710

105,-1.0983443844,2.837578781\H,1.8902782077,-1.636828875,-0.317199581

1\H,0.7261785563,-2.696101014,0.4954911802\H,0.238547356,-1.7984411287

,-0.9494430197\\Version=SGI-G98RevA.6\HF=-385.6462775\S2=0.761835\S2-1

=0.\S2A=0.750049\RMSD=5.442e-09\Dipole=0.0306117,-0.6873163,0.2416487\

PG=C01 [X(C6H11O2)]\\@

**9**

1\1\GINC-KATHY\SP\UB3LYP\CC-pVDZ\C2H3O2(2)\ZIPSE\10-Mar-2001\0\\#BECKE

3LYP/CC-PVDZ SCF=(DIRECT,TIGHT) GFINPUT GUESS=READ GEOM=CHECK INT=ULTRAFINE\\acylrad2sp1 b3lyp/cc-pVDZ//b3lyp/6-31G(d) sp\\0,2\C\C,1,1.59544

13464\H,2,1.0886537175,1,114.44967444\O,1,1.2837575566,2,103.57286637,

3,0.,0\O,1,1.2078918324,2,121.10336879,3,180.,0\H,2,1.092556321,1,104.

69097537,3,121.6189945,0\H,2,1.092556321,1,104.69097537,3,-121.6189945

,0\\Version=DEC-AXP-OSF/1-G98RevA.7\State=2-A'\HF=-228.4168353\S2=0.75

4292\S2-1=0.\S2A=0.750014\RMSD=2.866e-09\Dipole=0.232931,0.,1.03866\PG

=CS [SG(C2H1O2),X(H2)]\\@

**10**

1\1\GINC-TICHY\SP\RB3LYP\CC-pVDZ\C4H8\ROOT\11-Mar-2001\0\\#P BECKE3LYP

/CC-PVDZ GUESS=READ GEOM=CHECK SCF=(DIRECT,TIGHT) GFINPUT INT=(ULTRAFINE)\\buten3sp1 b3lyp/cc-pVDZ//B3LYP/6-31G(d) sp\\0,1\C\C,1,1.336625596

2\H,2,1.0873382527,1,121.74349136\H,2,1.0873382527,1,121.74349136,3,18

0.,0\C,1,1.5087989285,2,122.10646598,3,0.00051137,0\C,1,1.5087989285,2

,122.10646598,4,0.00051137,0\H,5,1.0989647995,1,111.04379501,2,-120.90

913775,0\H,6,1.0989647995,1,111.04379501,2,-120.90913775,0\H,5,1.09896

11123,1,111.04382366,7,-118.18040825,0\H,6,1.0989611123,1,111.04382366

,8,-118.18040825,0\H,5,1.0943010037,1,111.88434143,7,120.90913647,0\H,

6,1.0943010037,1,111.88434143,8,120.90913647,0\\Version=IBM-RS6000-G98

RevA.6\State=1-A\HF=-157.2311949\RMSD=8.029e-09\Dipole=0.,0.,-0.223826

3\PG=C02 [C2(C1C1),X(C2H8)]\\@

**11**

1\1\GINC-TEA\SP\RB3LYP\CC-pVDZ\C2H3O2(1-)\ZIPSE\09-Sep-2000\0\\#BECKE3

LYP/CC-PVDZ SCF=(DIRECT,TIGHT) GFINPUT GUESS=READ GEOM=CHECK INT=ULTRAFINE\\acylanionch31sp1 b3lyp/cc-pVDZ//b3lyp/6-31G(d) sp\\-1,1\O,-0.195

6613834,0.,-1.3579877082\C,-0.1954537511,0.,-0.1014778462\C,1.22257222

82,0.,0.5853699631\H,2.039349439,0.,-0.147864388\O,-1.1610551442,0.,0.

7044411799\H,1.3258359597,-0.8806078573,1.2364419566\H,1.3258359597,0.

8806078573,1.2364419566\\Version=SGI-G98RevA.6\State=1-A'\HF=-228.5131

543\RMSD=2.665e-09\Dipole=1.0246848,0.,0.5064197\PG=CS [SG(C2H1O2),X(H

2)]\\@

**12**

N-N= 1.189451780612D+02 E-N=-5.928727278332D+02 KE= 1.556075794390D+02

1\1\GINC-TEA\SP\UB3LYP\CC-pVDZ\C4H8(1+,2)\ZIPSE\09-Sep-2000\0\\#BECKE3

LYP/CC-PVDZ SCF=(DIRECT,TIGHT) GFINPUT GUESS=READ GEOM=CHECK INT=ULTRAFINE\\butenrc1sp1 b3lyp/cc-pVDZ//b3lyp/6-31G(d) sp\\1,2\C,-0.000010261

3,0.0007429643,0.0594699345\C,-0.0000973531,0.0184654395,1.4843828145\

H,0.9322723766,0.0264044203,2.0438219493\H,-0.9325355217,0.0244423149,

2.0437315676\C,1.2784839866,0.0367667295,-0.673713912\C,-1.2784012803,

-0.0535152591,-0.6727639559\H,1.179959493,0.5056863085,-1.6584626309\H

,-1.1797832573,-0.5471028024,-1.6453796249\H,2.0998504168,0.4765990216

,-0.1014657662\H,-1.5596567849,0.9957617137,-0.9011830328\H,1.55998014

74,-1.0178850416,-0.8755395181\H,-2.0999374211,-0.4786651803,-0.089772

2308\\Version=SGI-G98RevA.6\HF=-156.9049924\S2=0.752051\S2-1=0.\S2A=0.

750003\RMSD=5.537e-09\Dipole=0.000013,0.0044843,0.3614771\PG=C01 [X(C4

H8)]\\@

**1b**

1\1\GINC-TEA\SP\UB3LYP\CC-pVDZ\C6H8F3O2(2)\ZIPSE\27-Feb-2001\0\\#BECKE

3LYP/CC-PVDZ SCF=(DIRECT,TIGHT) GFINPUT GUESS=READ GEOM=CHECK INT=ULTRAFINE\\acoxcf3p1sp1 b3lyp/cc-pVDZ//b3lyp/6-31G(d) sp\\0,2\C,-0.0293778

034,-0.0344405805,-0.6705345184\O,-0.0054440353,-0.003130897,0.6556355

329\C,1.4267314286,-0.028746239,-1.2004745494\O,-0.9832420464,-0.06320

83536,-1.4098951962\C,-2.1438860647,-1.1626944771,1.0281457474\C,-1.30

89397839,0.0007559325,1.4310658546\H,-1.8561813963,-2.1630802859,1.336

6044031\H,-2.96351633,-1.0488337298,0.3294323965\F,1.4374270605,-0.077

3085587,-2.5348475402\F,2.0660477787,1.0892016021,-0.8074872783\F,2.10

66523242,-1.0897126577,-0.7274232668\C,-1.9968486486,1.3450614533,1.18

84345046\H,-1.3184741959,2.1697265494,1.4291901502\H,-2.8773973415,1.4

242852763,1.8349337651\H,-2.3195051756,1.4401469587,0.1493831577\C,-0.

8106151139,-0.1344657641,2.8717772815\H,-1.6602882781,-0.1106081259,3.

5612169367\H,-0.1315728642,0.6866708309,3.1217670203\H,-0.2771043208,-

1.0800388896,3.0088863231\\Version=SGI-G98RevA.6\HF=-683.4101778\S2=0.

75381\S2-1=0.\S2A=0.750009\RMSD=6.268e-09\Dipole=-0.6375814,0.0365457,

1.1276941\PG=C01 [X(C6H8F3O2)]\\@

**2b**

1\1\GINC-TEA\SP\UB3LYP\CC-pVDZ\C6H8F3O2(2)\ZIPSE\17-Oct-2000\0\\#BECKE

3LYP/CC-PVDZ SCF=(DIRECT,TIGHT) GFINPUT GUESS=READ GEOM=CHECK INT=ULTRAFINE\\acoxcf31sp1 b3lyp/cc-pVDZ//b3lyp/6-31G(d) sp\\0,2\C,0.593739474

5,0.4490420258,0.2835952596\O,0.3255980348,1.6240484212,0.2166506748\C

,1.9589394139,-0.1242981353,-0.1650281002\O,-0.1755110023,-0.538539472

3,0.7290076741\C,-1.5443810204,-0.1540577089,1.1953418607\C,-2.5208847

479,-0.0744032295,0.0807026096\H,-1.7723633679,-0.9668690982,1.8890247

475\H,-1.4450425968,0.7892023095,1.7352216002\F,2.754196284,0.85474157

23,-0.603165384\F,2.5702841689,-0.7486988401,0.857852425\F,1.787149452

9,-1.0151494534,-1.1598839008\C,-2.8468975846,1.2382138447,-0.56023192

31\H,-2.2875460712,1.3814808921,-1.5003698976\H,-2.5985902098,2.085652

6302,0.0850755129\H,-3.9118885104,1.2948004976,-0.8245768826\C,-2.9654

730709,-1.3412777748,-0.5823422948\H,-3.9822947172,-1.2476679512,-0.98

45295849\H,-2.9423547017,-2.1955022786,0.1044937967\H,-2.315540025,-1.

6025222322,-1.4350588172\\Version=SGI-G98RevA.6\HF=-683.4184844\S2=0.7

54013\S2-1=0.\S2A=0.750012\RMSD=4.998e-09\Dipole=-1.153223,-0.3636007,

0.197313\PG=C01 [X(C6H8F3O2)]\\@

**3b**

1\1\GINC-TEA\SP\UB3LYP\CC-pVDZ\C6H8F3O2(2)\ZIPSE\06-Mar-2001\0\\#BECKE

3LYP/CC-PVDZ SCF=(DIRECT,TIGHT) GFINPUT GUESS=READ GEOM=CHECK INT=ULTRAFINE\\acoxcf3intsp1 b3lyp/cc-pVDZ//b3lyp/6-31G(d) sp\\0,2\C,1.4868351

721,1.3826978909,0.1769049188\O,0.0543883535,1.4688734962,0.204486902\

C,-0.4097724503,0.4113032559,-0.534132128\O,0.5658340539,-0.5171915175

,-0.7604566343\C,1.755938261,-0.1224292386,0.0013903486\C,-1.738742738

6,-0.1213038144,-0.0797738858\C,2.9800685719,-0.437160135,-0.845822432

9\C,1.7373590227,-0.8776971691,1.3315316944\H,1.865117472,1.7953828365

,1.1141680914\H,1.8721756552,1.9658046251,-0.6691882756\F,-2.645299269

7,0.8691048541,-0.0100173158\F,-2.1841706694,-1.0589909815,-0.93430831

74\F,-1.6856196201,-0.701372645,1.1540036115\H,3.0556117326,-1.5146758

552,-1.0208673989\H,2.9211284545,0.067234998,-1.8150502319\H,3.8922761

882,-0.1105336433,-0.3340809338\H,1.7612997722,-1.9567109474,1.1514789

966\H,2.6078872385,-0.6078303162,1.9406976405\H,0.8284152276,-0.643263

3161,1.8929070751\\Version=SGI-G98RevA.6\HF=-683.4061967\S2=0.752741\S

2-1=0.\S2A=0.750005\RMSD=6.739e-09\Dipole=1.702103,0.1816604,0.2452487

\PG=C01 [X(C6H8F3O2)]\\@

**4b**

1\1\GINC-TEA\SP\UB3LYP\CC-pVDZ\C6H8F3O2(2)\ZIPSE\02-Mar-2001\0\\#BECKE

3LYP/CC-PVDZ SCF=(DIRECT,TIGHT) GFINPUT GUESS=READ GEOM=CHECK INT=ULTRAFINE\\acoxcf3ts1sp1 b3lyp/cc-pVDZ//b3lyp/6-31G(d) sp\\0,2\C,-1.049985

7931,0.4729984799,2.2512016638\C,0.3473060214,0.4708922757,2.241151767

1\C,1.0954151476,1.7775840151,2.2217075312\C,1.0954248235,-0.733125520

1,2.7492345404\O,0.7116725686,0.0426739637,0.2030872663\C,-0.388082645

,-0.0856648231,-0.4077077245\C,-0.1922485841,-0.4051221285,-1.92813051

29\O,-1.5512847514,0.0015454431,0.0073839486\F,0.499894567,0.584327325

9,-2.5220818555\F,0.4998876068,-1.5499467399,-2.0736475022\F,-1.361429

7939,-0.5386544823,-2.5636813391\H,-1.6110611549,-0.4200690154,2.49894

93251\H,-1.6110679734,1.3902515658,2.1185833635\H,2.0583199003,1.66822

04011,1.7166280058\H,0.5230845843,2.5638132616,1.7224327835\H,1.292018

1221,2.0992911707,3.2542248879\H,2.0583303025,-0.8362732586,2.24285043

33\H,1.2920269661,-0.6120871283,3.8239147808\H,0.5231014736,-1.6538109

781,2.6085993815\\Version=SGI-G98RevA.6\HF=-683.3965671\S2=0.755694\S2

-1=0.\S2A=0.75002\RMSD=9.389e-09\Dipole=0.3583294,0.3696558,1.7593242\

PG=C01 [X(C6H8F3O2)]\\@

**5b**

1\1\GINC-TEA\SP\UB3LYP\CC-pVDZ\C6H8F3O2(2)\ZIPSE\02-Mar-2001\0\\#BECKE

3LYP/CC-PVDZ SCF=(DIRECT,TIGHT) GFINPUT GUESS=READ GEOM=CHECK INT=ULTRAFINE\\acoxcf3ts3sp1 b3lyp/cc-pVDZ//b3lyp/6-31G(d) sp\\0,2\C,-1.234040

1912,0.8749968667,-2.2403561032\C,0.1432281857,0.8619790841,-2.2873532

957\C,0.9307242628,2.1398486897,-2.2817591593\C,0.8947408964,-0.400816

61,-2.6006058554\O,0.0513444029,0.7051523938,-0.0525759247\C,-0.438544

0468,-0.3999835441,0.4037911069\O,-1.1131227213,-1.2599701015,-0.13574

52425\C,-0.0067530123,-0.5891983777,1.900651135\H,-1.7748522278,1.8030

821455,-2.0819991455\H,-1.8061020314,-0.0436370425,-2.2926770782\F,-0.

6460552528,-1.6248042078,2.4527884774\F,-0.2723752825,0.5090505075,2.6

305048218\F,1.3192009265,-0.8265841597,1.9670899738\H,1.8277568351,-0.

4471323303,-2.0301164022\H,0.2986789696,-1.2887226802,-2.3821278171\H,

1.1659529072,-0.406567769,-3.6657637123\H,1.7536194568,2.0710367166,-1

.5633352234\H,1.3734840221,2.307328612,-3.2731157092\H,0.3126185268,3.

0032380971,-2.0239520008\\Version=SGI-G98RevA.6\HF=-683.3937868\S2=0.7

60175\S2-1=0.\S2A=0.750041\RMSD=4.417e-09\Dipole=0.3594513,0.9105766,-

1.743281\PG=C01 [X(C6H8F3O2)]\\@

**7b**

1\1\GINC-TEA\SP\UB3LYP\CC-pVDZ\C6H8F3O2(2)\ZIPSE\03-Mar-2001\0\\#BECKE

3LYP/CC-PVDZ SCF=(DIRECT,TIGHT) GFINPUT GUESS=READ GEOM=CHECK INT=ULTRAFINE\\acoxcf3ts5sp1 b3lyp/cc-pVDZ//b3lyp/6-31G(d) sp\\0,2\C,-1.690310

209,-0.4608518658,-0.4037302981\C,-0.1727499904,-0.4974512339,-0.46980

04924\O,0.4100430912,0.7045635175,-0.4878845522\C,1.642090011,0.689399

0918,0.399984165\C,2.8471244092,0.6298667017,-0.535488125\O,0.48733572

82,-1.468822782,0.0019329646\C,1.5175900163,-0.5289964162,1.262772447\

C,1.5533862948,2.000905963,1.1782000057\H,2.367914591,-1.193389605,1.3

610829588\H,0.8540077933,-0.480659282,2.1219661468\F,-2.2062020143,-1.

6716701107,-0.6587090427\F,-2.1136190803,-0.0867888164,0.8332759395\F,

-2.1942802124,0.4194153739,-1.2852214476\H,1.506502576,2.848443256,0.4

866898003\H,0.6577278074,2.0179547855,1.8066522128\H,2.4335599226,2.12

67169541,1.8174554133\H,2.8168760625,1.4608792185,-1.2462762297\H,3.77

73763361,0.698266608,0.0396089876\H,2.8511329276,-0.3099792831,-1.0953

018443\\Version=SGI-G98RevA.6\HF=-683.3767908\S2=0.763803\S2-1=0.\S2A=

0.75006\RMSD=7.166e-09\Dipole=1.2520682,0.5576044,0.5650278\PG=C01 [X(

C6H8F3O2)]\\@

**8b**

1\1\GINC-TEA\SP\UB3LYP\CC-pVDZ\C6H8F3O2(2)\ZIPSE\03-Mar-2001\0\\#BECKE

3LYP/CC-PVDZ SCF=(DIRECT,TIGHT) GFINPUT GUESS=READ GEOM=CHECK INT=ULTRAFINE\\acoxcf3ts2sp1 b3lyp/cc-pVDZ//b3lyp/6-31G(d) sp\\0,2\C,-1.600008

8847,-0.2988360907,0.6682098553\C,-0.0852255753,-0.2902268644,0.706804

3284\O,0.5954280602,0.7771991009,0.7347024554\O,0.4857574068,-1.373869

5177,0.1338147783\C,1.7196372823,-0.9529869623,-0.5429045702\C,1.66381

86705,0.5225439395,-0.8341462692\C,0.7887368362,0.963180824,-1.9733126

333\C,2.8755227679,1.3489421832,-0.523004544\H,1.7585122301,-1.5674881

01,-1.4464309435\H,2.5609277831,-1.2043376626,0.1099906838\F,-2.082997

9602,-1.4757026943,1.1059414903\F,-2.0929034457,0.6840196975,1.4358064

05\F,-2.0937850004,-0.1136201476,-0.5907225303\H,2.6271143267,2.415205

4875,-0.5147187377\H,3.2940080723,1.0845365794,0.4528066755\H,3.659502

3132,1.2009735262,-1.281516642\H,0.5895537026,2.0382429855,-1.92128907

34\H,1.2821974901,0.763338082,-2.9380268491\H,-0.169008578,0.434918561

4,-1.9780582694\\Version=SGI-G98RevA.6\HF=-683.3831559\S2=0.763278\S2-

1=0.\S2A=0.750058\RMSD=8.397e-09\Dipole=1.3591602,0.0975083,-0.9103777

\PG=C01 [X(C6H8F3O2)]\\@

**14**

1\1\GINC-HPS075\SP\RB3LYP\CC-pVDZ\C2F3O2(1-)\UI271AB\28-Feb-2001\0\\#B

ECKE3LYP/CC-PVDZ SCF=(TIGHT,DIRECT) GFINPUT GUESS=READ GEOM=CHECK INT=ULTRAFINE\\tfa1sp1 b3lyp/cc-pVDZ//b3lyp/6-31G(d) sp\\-1,1\O\C,1,1.2462

789667\C,2,1.5796642858,1,114.78705102\F,3,1.3609082498,2,114.79343767

,1,0.,0\O,2,1.2481927485,3,112.08016697,4,180.,0\F,3,1.3672057798,2,11

2.24295096,1,-120.59340742,0\F,3,1.3672057798,2,112.24295096,1,120.593

40742,0\\Version=IBM-RS6000-G98RevA.5\State=1-A'\HF=-526.2758118\RMSD=

**Supplemental Table 1**. Absolute Energies (in au) for Stationary Points in the Rearrangement Reaction of Radical **1a**.

Theoretical method **1a 2a 3a 4a 5a 7a 8a**

**-Etot**

B3LYP/6-31G(d) 385.665843 385.674951 385.653121 385.647459 385.644402 385.625793 385.628939

B3LYP/cc-pVDZ//B3LYP/6-31G(d) 385.682985 385.691882 385.669347 385.665678 385.662487 385.643123 385.646278

B3LYP/aug-cc-pVDZ//B3LYP/6-31G(d) 385.714632 385.722866 385.701189 385.697992 385.695254 385.675290 385.678275

B3LYP/cc-pVTZ//B3LYP/6-31G(d) 385.813627 385.822645 385.797917 385.797408 385.795087 385.772189 385.775213

B3LYP/aug-cc-pVTZ//B3LYP/6-31G(d) 385.818462 385.827516 385.803316 385.802556 385.800242 385.777473 385.780637

G3(ROMP2)//B3LYP 385.068577 385.069313 385.049945 385.039798 385.041156 385.023859 385.025004

-E0(B3LYP/6-31G(d)) 385.506220 385.513903 385.489015 385.488287 385.486107 385.465497 385.468467

-H298(B3LYP/6-31G(d)) 385.494994 385.502356 385.479346 385.477352 385.474722 385.455739 385.458330

-G298(B3LYP/6-31G(d)) 385.541828 385.552224 385.522547 385.524704 385.523421 385.499000 385.502609

a All thermochemical data has been calculated at the Becke3LYP/6-31G(d) level of theory.

**Supplemental Table 2**. Absolute Energies (in au) for Fragments of Radicals **1a** and **1b**.

Theoretical method **9 10 11 12 13 14**

**-Etot**

B3LYP/6-31G(d) 228.402002 157.227292 228.497911 156.903791 - 526.237544

B3LYP/cc-pVDZ//B3LYP/6-31G(d) 228.416835 157.231195 228.513154 156.904992 - 526.275812

B3LYP/aug-cc-pVDZ//B3LYP/6-31G(d) 228.437666 157.243225 228.562264 156.914178 - 526.351000

B3LYP/cc-pVTZ//B3LYP/6-31G(d) 228.493455 157.289785 228.606911 156.959742 - 526.469228

B3LYP/aug-cc-pVTZ//B3LYP/6-31G(d) 228.497467 157.291123 228.621645 156.960661 - 526.489687

G3(MP2)//B3LYP 228.1082385 156.916472 228.236983 156.575208 -

-E0(B3LYP/6-31G(d)) 228.355177 157.118766 228.449646 156.798530 - 526.211680

-H298(B3LYP/6-31G(d)) 228.349369 157.112534 228.444239 156.791563 - 526.204612

-G298(B3LYP/6-31G(d)) 228.383075 157.145395 228.477345 156.827608 - 526.244195

a All thermochemical data has been calculated at the Becke3LYP/6-31G(d) level of theory.

**Supplemental Table 3**. Absolute Energies (in au) for Stationary Points in the Rearrangement Reaction of Radical **1b**.

Theoretical method **1b 2b 3b 4b 5b 7b 8b**

**-Etot**

B3LYP/6-31G(d) 683.370328 683.378772 683.367363 683.355609 683.352844 683.336929 683.343019

B3LYP/cc-pVDZ//B3LYP/6-31G(d) 683.410178 683.418484 683.406197 683.396567 683.393787 683.376791 683.383156

B3LYP/aug-cc-pVDZ//B3LYP/6-31G(d) 683.468514 683.476030 683.463977 683.455702 683.453498 683.435689 683.440690

B3LYP/cc-pVTZ//B3LYP/6-31G(d) 683.641700 683.650086 683.634939 683.629243 683.627368 683.606930 683.612022

B3LYP/aug-cc-pVTZ//B3LYP/6-31G(d) 683.652258 683.660634 683.645829 683.640327 683.638462 683.617893 683.623009

G3(ROMP2/B3LYP 682.570428 - - 682.5453776 682.5408081 - -

-E0(B3LYP/6-31G(d)) 683.233716 683.240737 683.226132 683.219536 683.217426 683.199709 683.205281

-H298(B3LYP/6-31G(d)) 683.220622 683.227338 683.214568 683.206767 683.204256 683.187978 683.193309

-G298(B3LYP/6-31G(d)) 683.273520 683.283282 683.263247 683.260313 683.258633 683.237422 683.243200

a All thermochemical data has been calculated at the Becke3LYP/6-31G(d) level of theory.
